# Supplementary material for: Cyclic phosphonium ionic liquids
Source: publisher site journal article supplement (doi:10.3762/bjoc.10.22), 2014-01-24

**Supporting Information**  
**for**  
**Cyclic phosphonium ionic liquids**

Sharon I. Lall-Ramnarine\*<sup>1</sup>, Joshua A. Mukhlall<sup>1,2</sup>, James F. Wishart\*<sup>3</sup>, Robert R. Engel\*<sup>2</sup>,  
Alicia R. Romeo<sup>1</sup>, Masao Gohdo<sup>3,4</sup>, Sharon Ramati<sup>1,2</sup>, Marc Berman<sup>5</sup>, and Sophia N.  
Suarez<sup>6</sup>

Address: <sup>1</sup>Chemistry Department, Queensborough Community College of the City  
University of New York, 222-05 56<sup>th</sup> Avenue, Bayside, NY, 11364, USA, Fax: +1 718-  
281-5078, Tel: +1 718-281-5572, <sup>2</sup>Department of Chemistry and Biochemistry, Queens  
College of the City University of New York, 65-30 Kissena Boulevard, Flushing, NY,  
11367, USA, Fax: +1 718-997-5531, Tel: +1 718-997-4106, <sup>3</sup>Chemistry Department,  
Brookhaven National Laboratory, Upton, NY, 11973, USA, Fax: +1 631-344-5815, Tel:  
+1 631-344-4327, <sup>4</sup>The Institute of Scientific and Industrial Research (ISIR), Osaka  
University, 8-1 Mihogaoka, Ibaraki, Osaka 567-0047, Japan, <sup>5</sup>Department of Physics and  
Astronomy, Hunter College of the City University of New York, 695 Park Ave., New York,  
NY, 10065, USA and <sup>6</sup>Physics Department, Brooklyn College of the City University of  
New York, 2900 Bedford Avenue, Brooklyn, NY 11210, USA, Fax: +1 718-951-4407, Tel  
+1 718-951-5000, ext. 2869

Email: Sharon Lall-Ramnarine - slallramnarine@qcc.cuny.edu; James F. Wishart -  
wishart@bnl.gov; Robert R. Engel - Robert.engel@qc.cuny.edu

\*Corresponding author

**NMR spectra**



$^{31}\text{P}$  NMR ( $\text{CDCl}_3$ ): **3a**

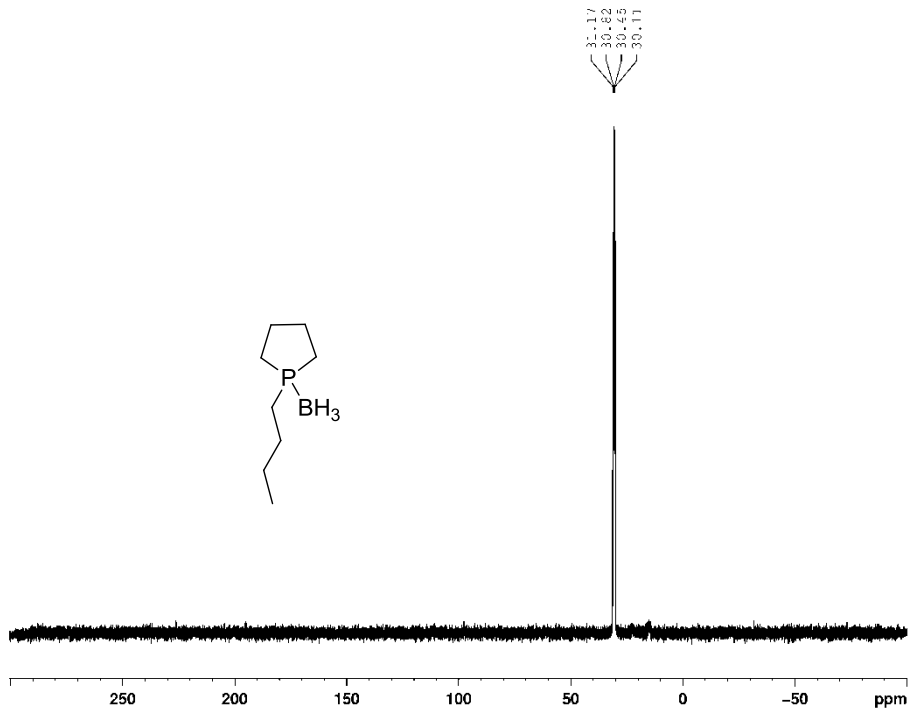

$^1\text{H}$  NMR ( $\text{CDCl}_3$ ): **3b**

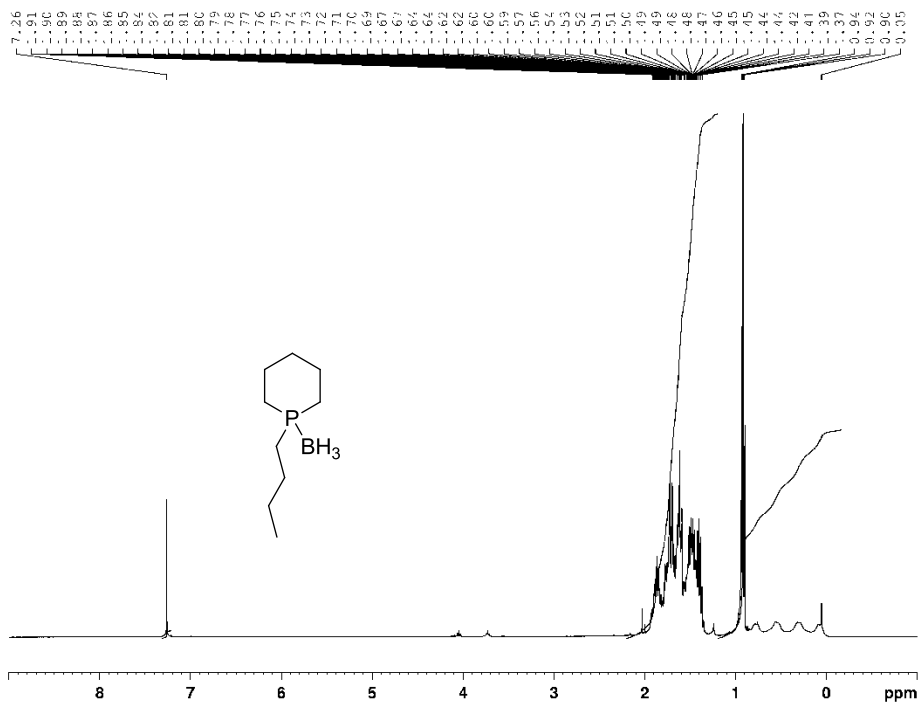

$^{13}\text{C}$  NMR ( $\text{CDCl}_3$ ): **3b**

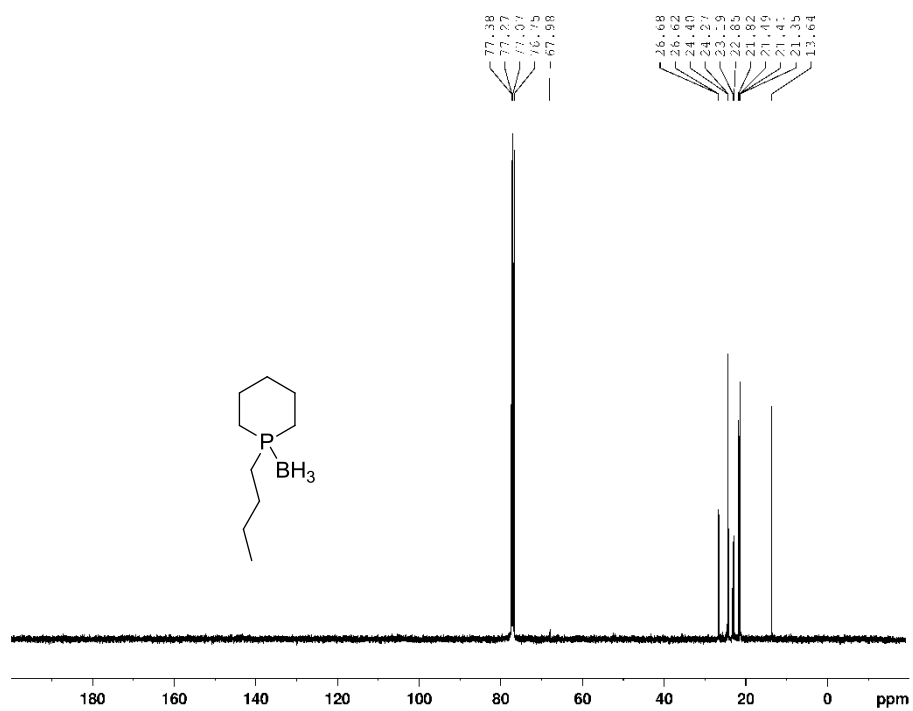

$^{31}\text{P}$  NMR ( $\text{CDCl}_3$ ): **3b**

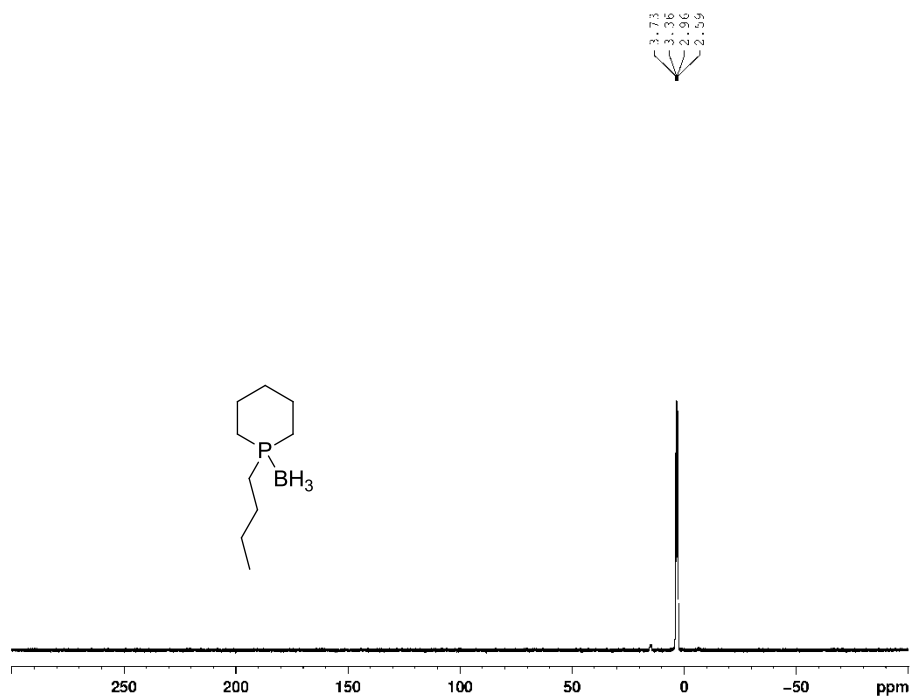

$^1\text{H}$  NMR ( $\text{CDCl}_3$ ): **3c**

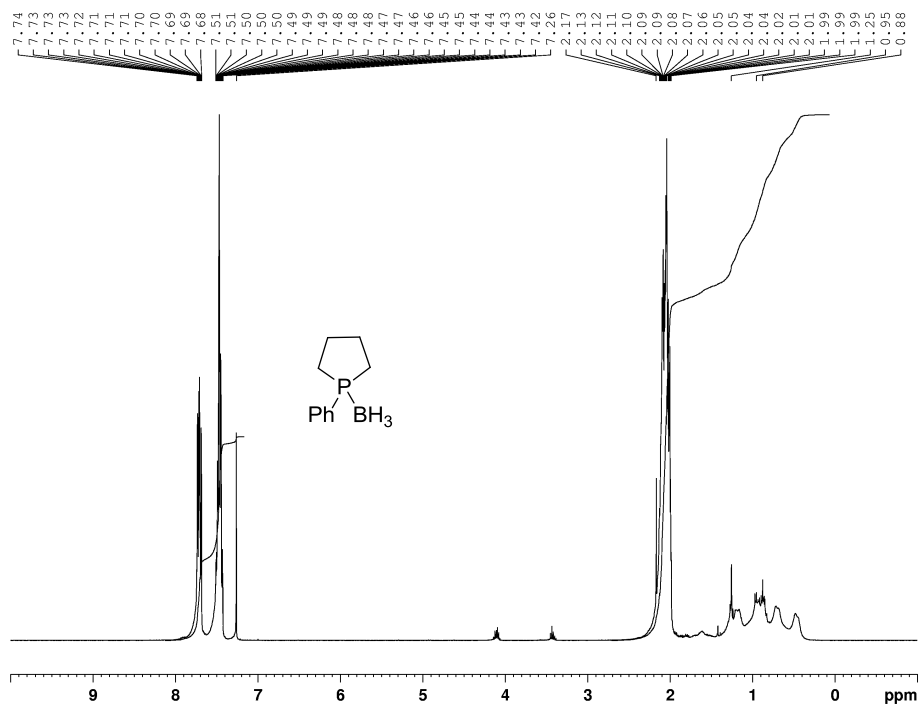

$^{13}\text{C}$  NMR ( $\text{CDCl}_3$ ): **3c**

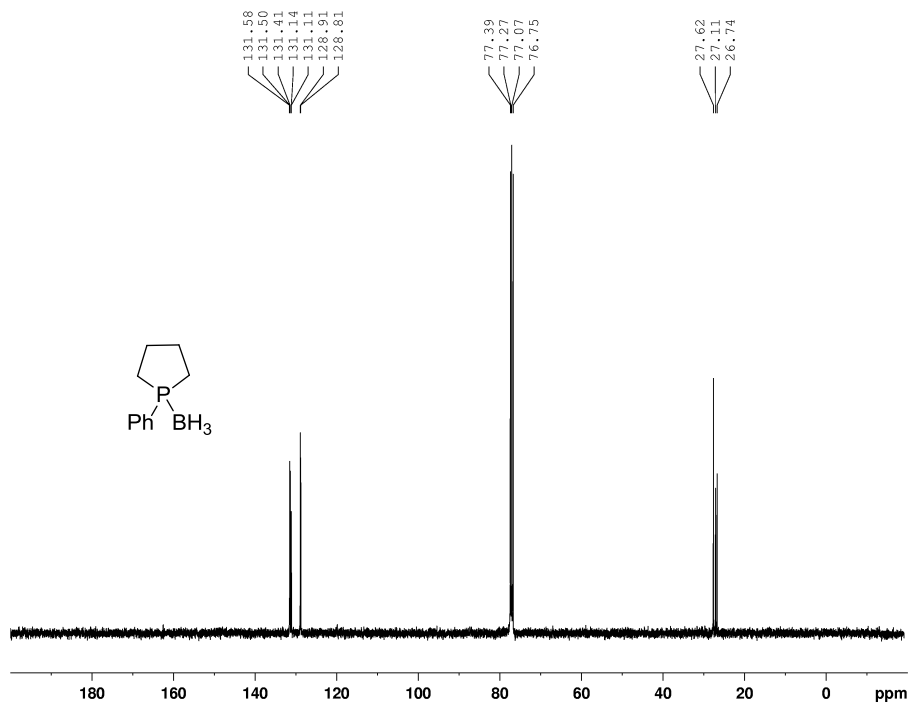



$^{13}\text{C}$  NMR ( $\text{D}_2\text{O}$ ): **4a**

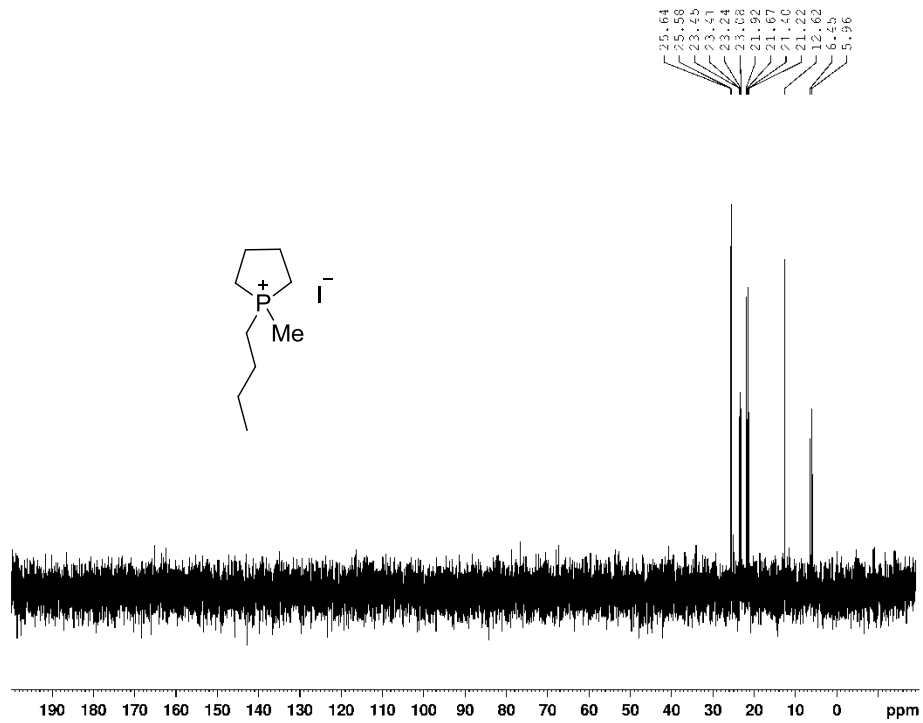

$^{31}\text{P}$  NMR ( $\text{D}_2\text{O}$ ): **4a**

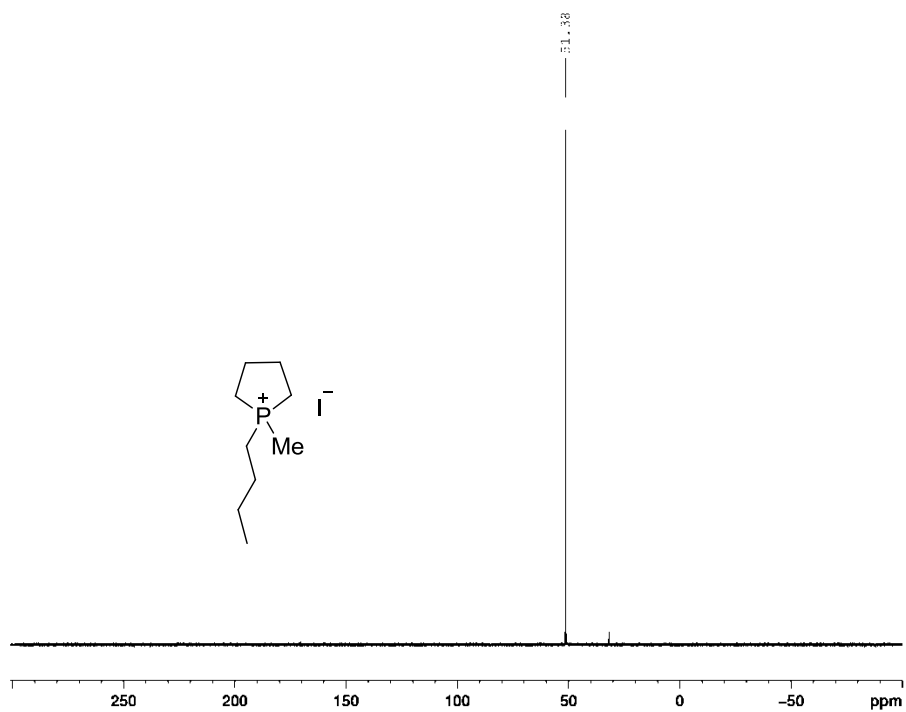

$^1\text{H}$  NMR ( $\text{CDCl}_3$ ): **4b**

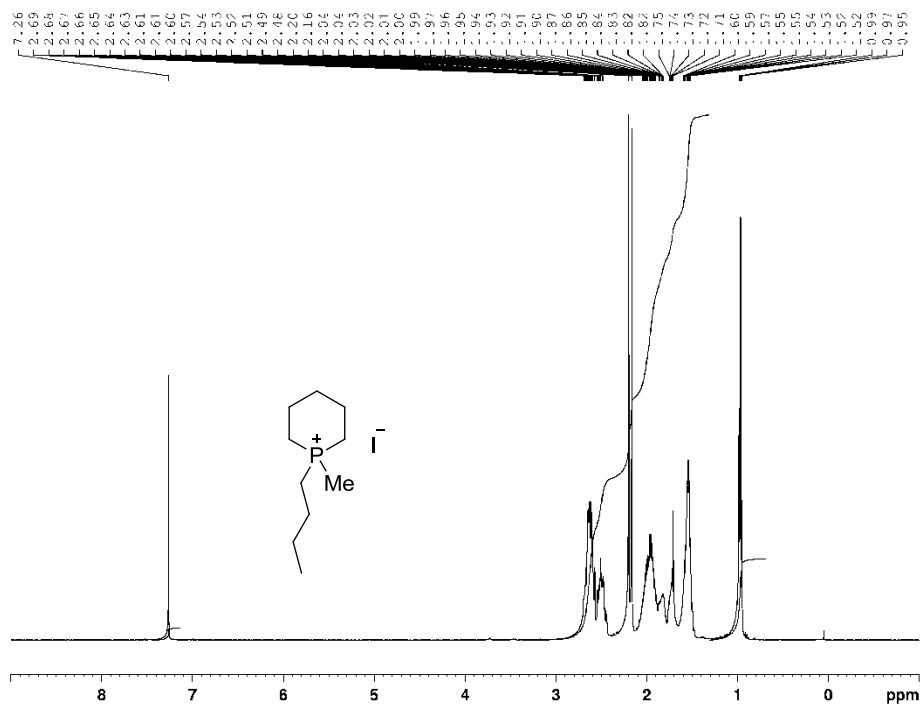

$^{13}\text{C}$  NMR ( $\text{CDCl}_3$ ): **4b**

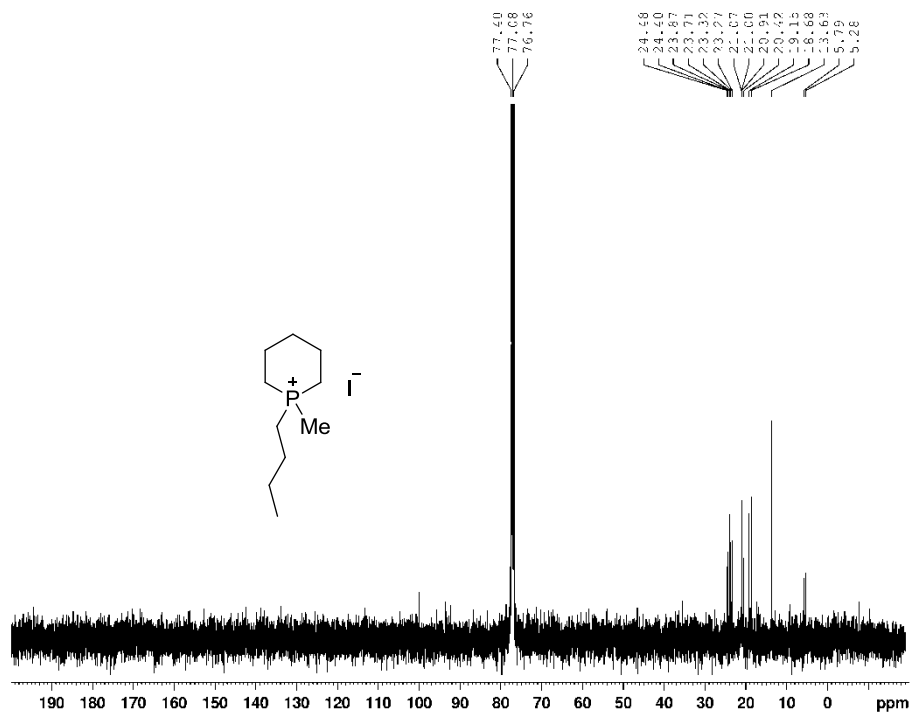



$^{31}\text{P}$  NMR ( $\text{CDCl}_3$ ): **4b**

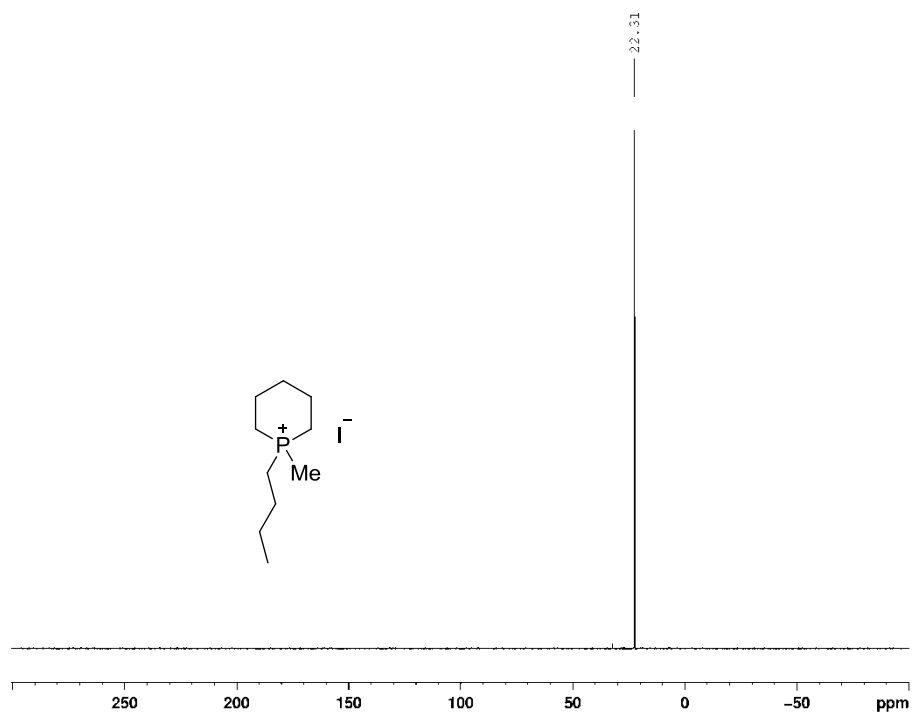

$^1\text{H}$  NMR ( $\text{CDCl}_3$ ): **4c**

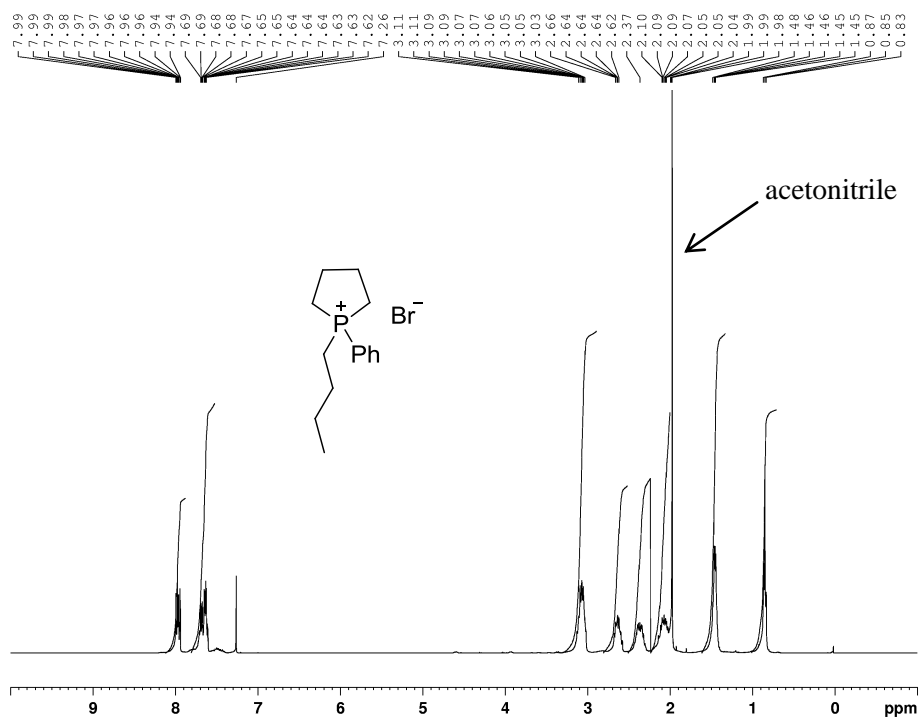

$^{31}\text{P}$  NMR ( $\text{CDCl}_3$ ): **4c**

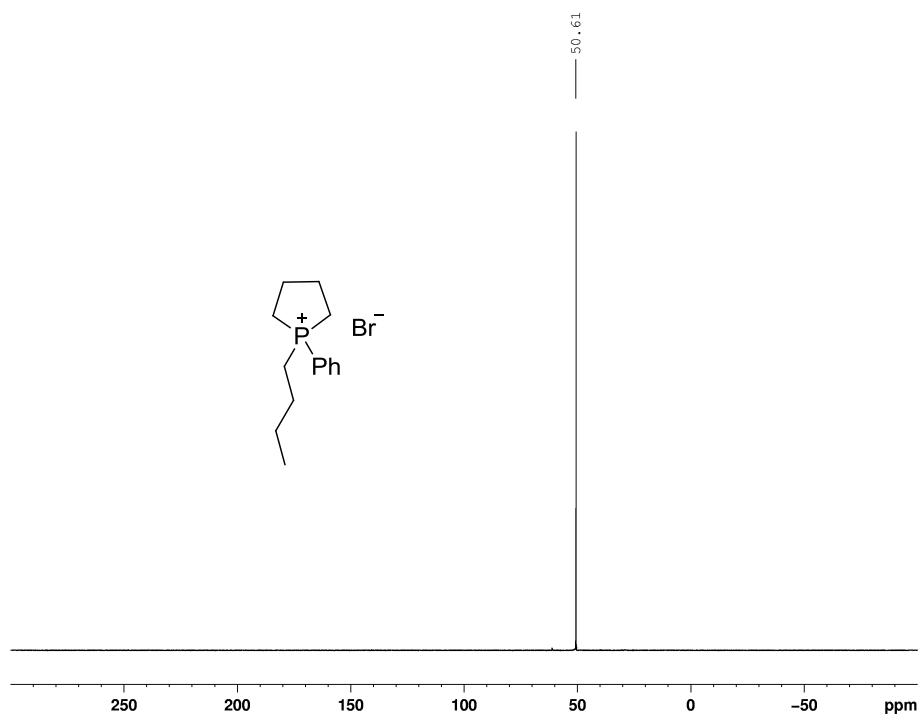

$^1\text{H}$  NMR ( $\text{D}_2\text{O}$ ): **4d**

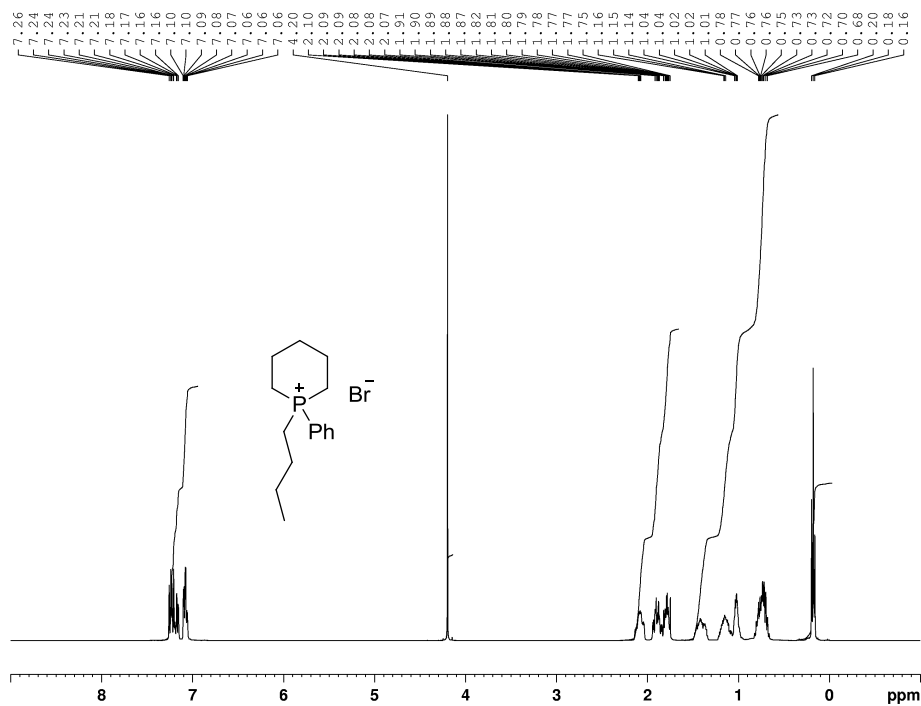

$^{13}\text{C}$  NMR ( $\text{D}_2\text{O}$ ): **4d**

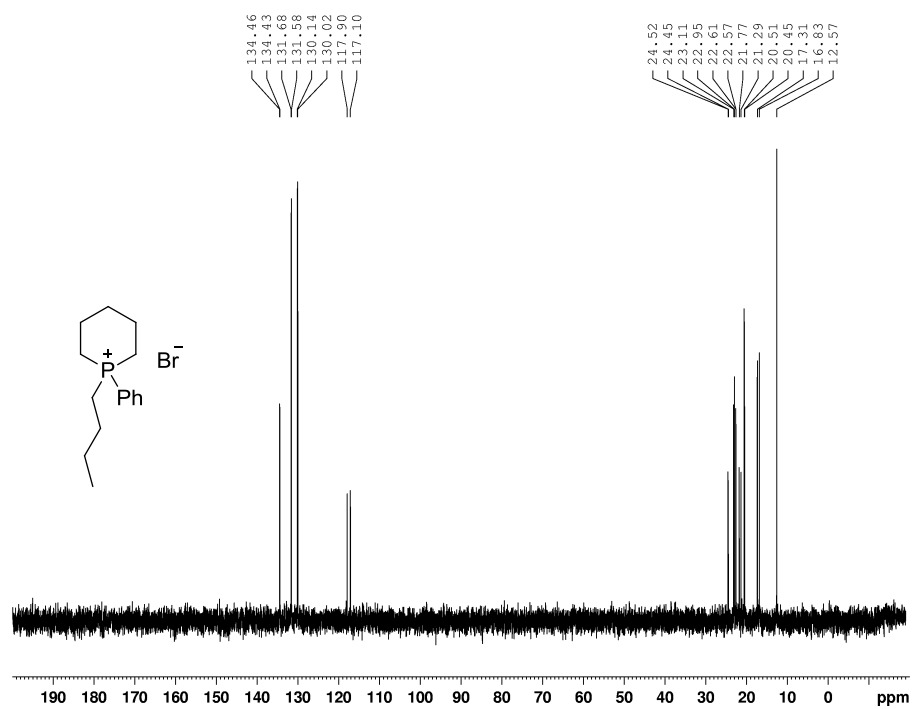

$^{31}\text{P}$  NMR ( $\text{D}_2\text{O}$ ): **4d**

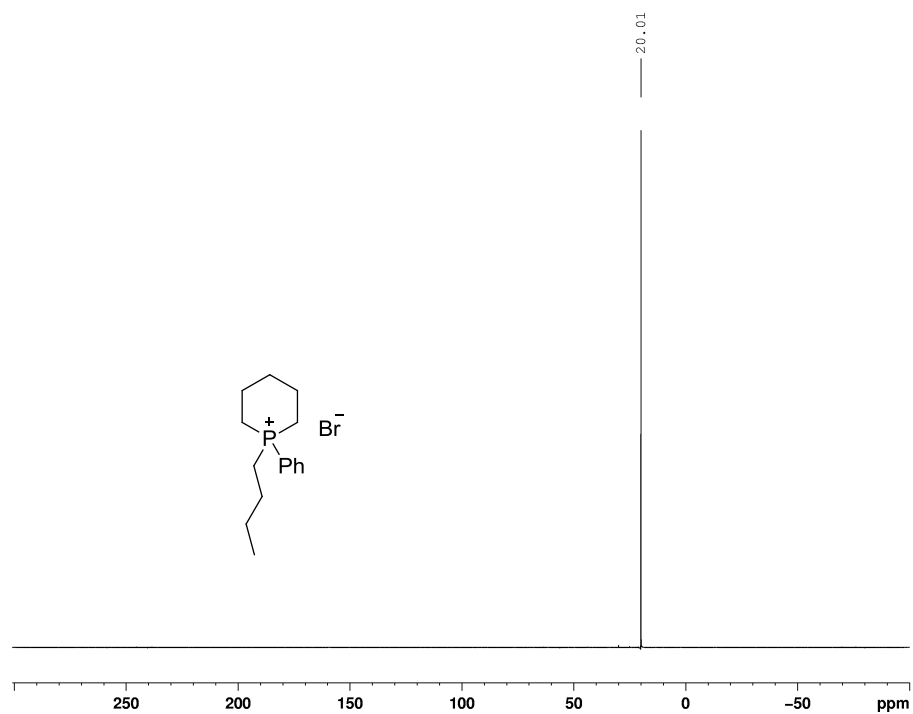

$^1\text{H}$  NMR ( $\text{CDCl}_3$ ): **5a**

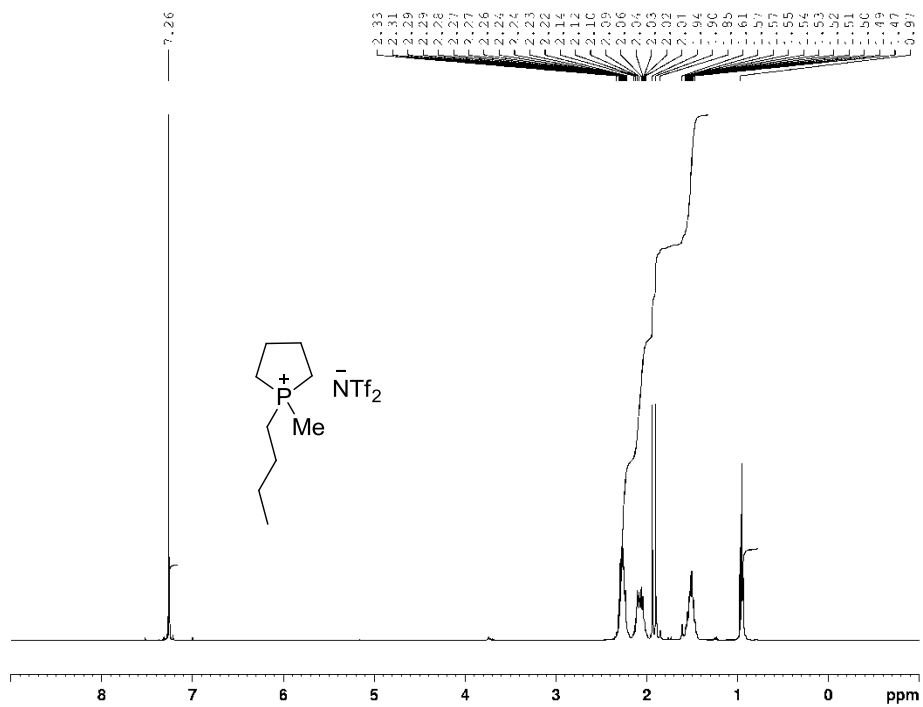

$^{13}\text{C}$  NMR ( $\text{CDCl}_3$ ): **5a**

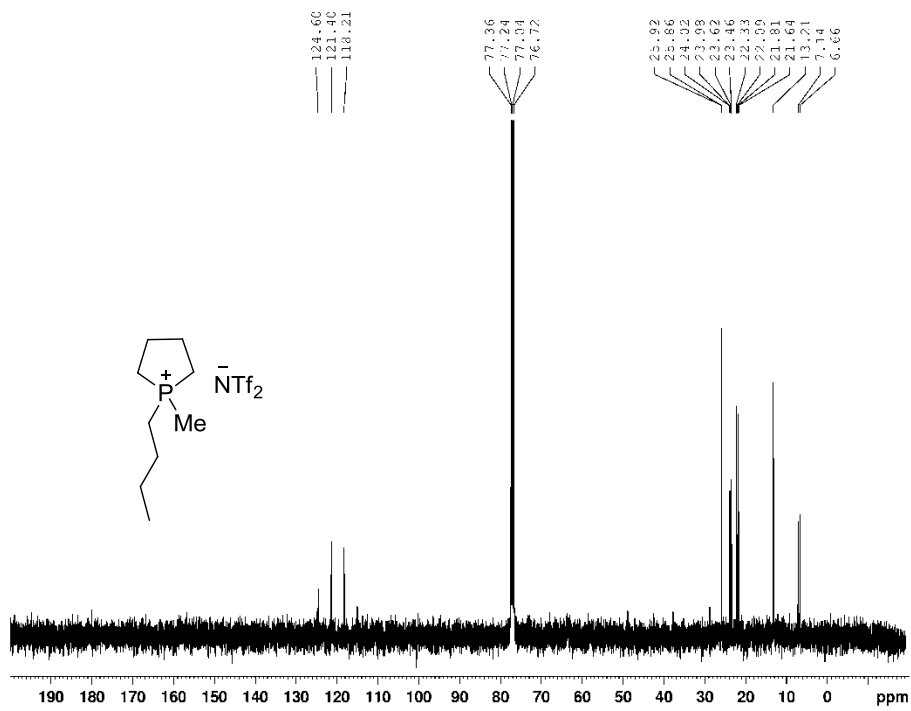

$^{31}\text{P}$  NMR ( $\text{CDCl}_3$ ): **5a**

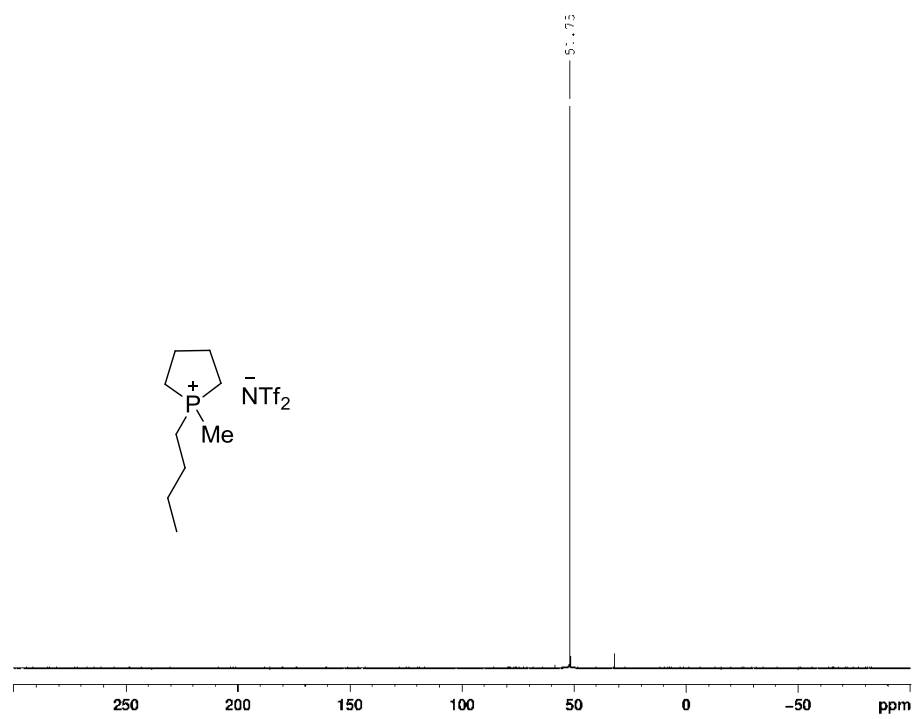

$^1\text{H}$  NMR ( $\text{CDCl}_3$ ): **5b**

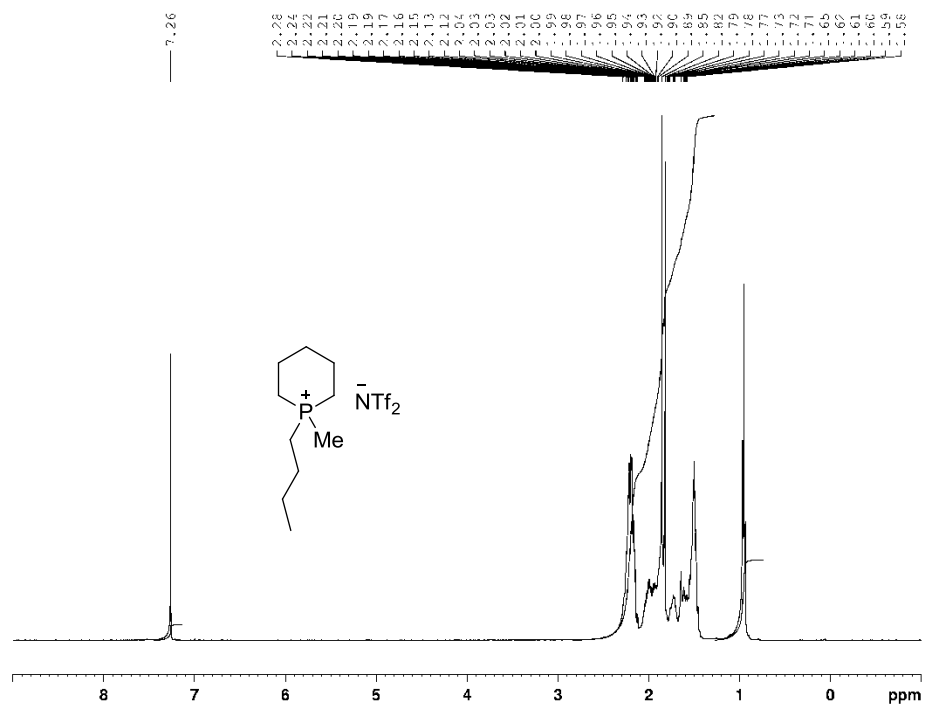

$^{13}\text{C}$  NMR ( $\text{CDCl}_3$ ): **5b**

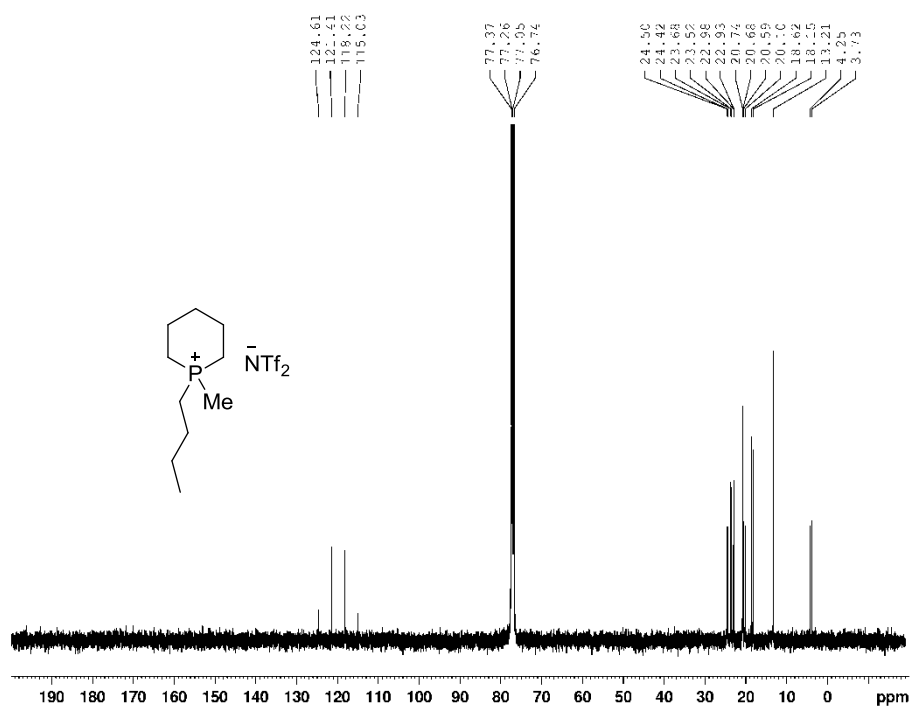

$^{31}\text{P}$  NMR ( $\text{CDCl}_3$ ): **5b**

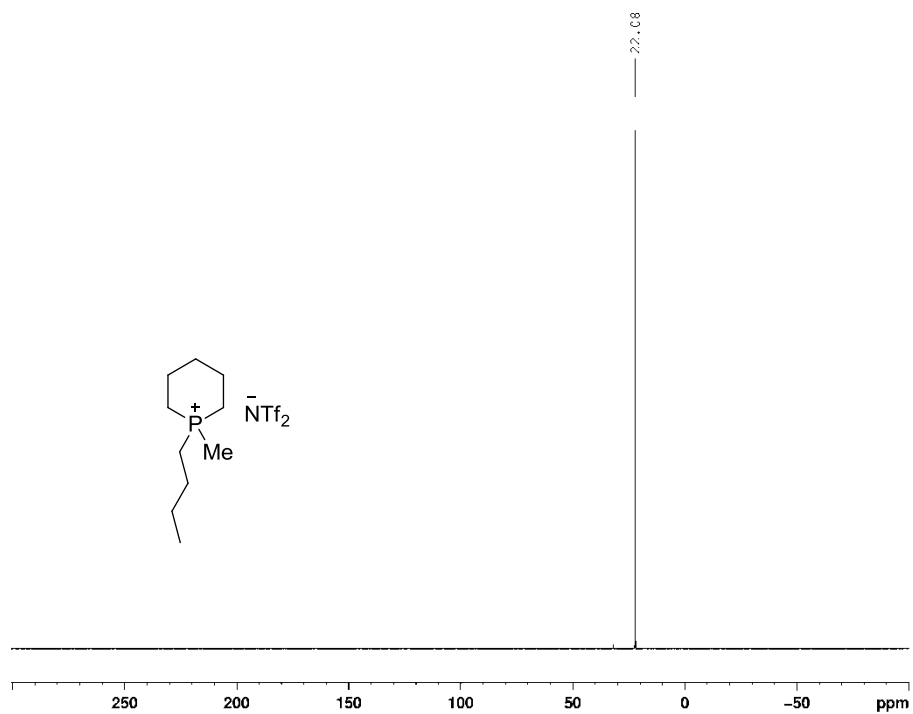

$^1\text{H}$  NMR ( $\text{CDCl}_3$ ): **5c**

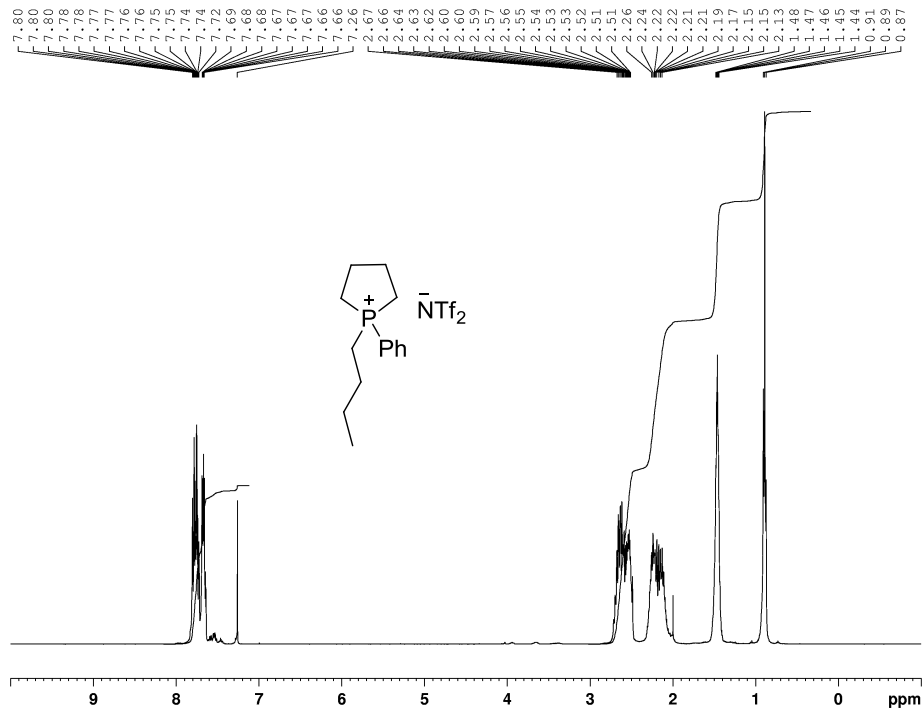

$^{13}\text{C}$  NMR ( $\text{CDCl}_3$ ): **5c**

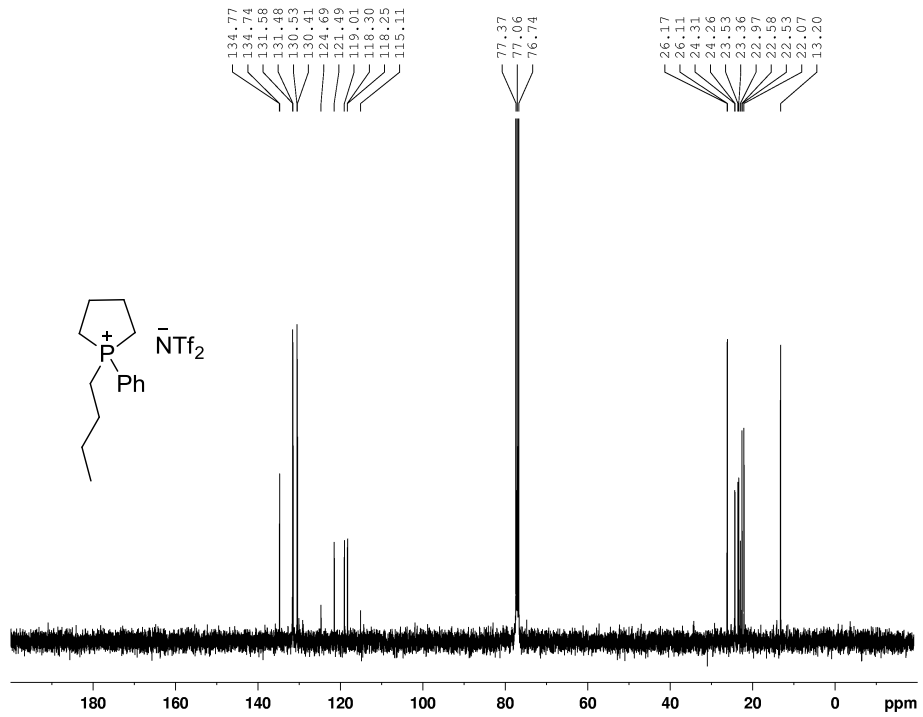

$^{31}\text{P}$  NMR ( $\text{CDCl}_3$ ): **5c**

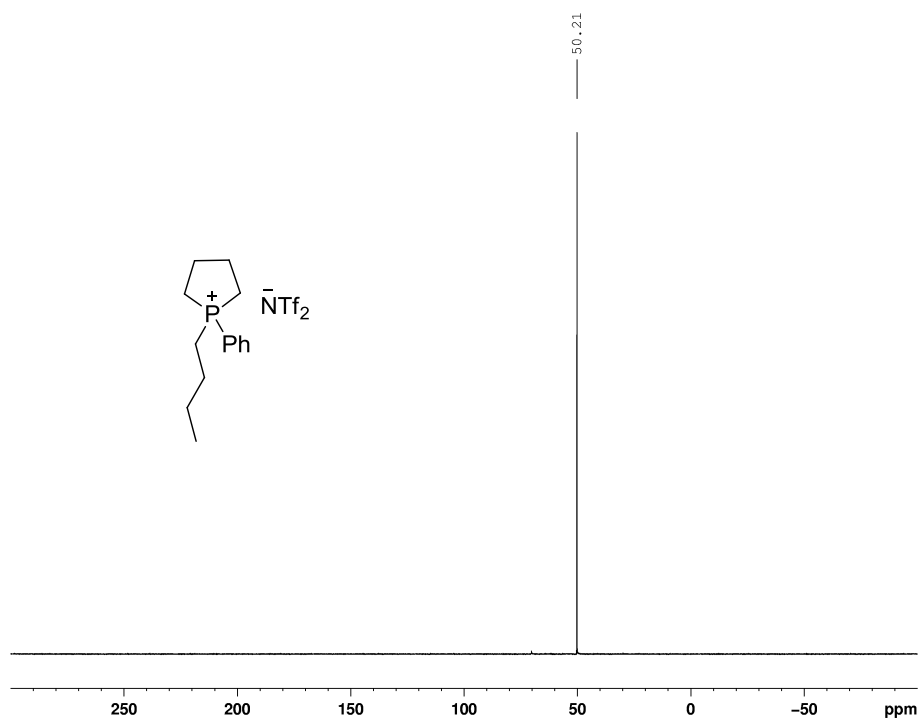

$^1\text{H}$  NMR ( $\text{CDCl}_3$ ): **5d**

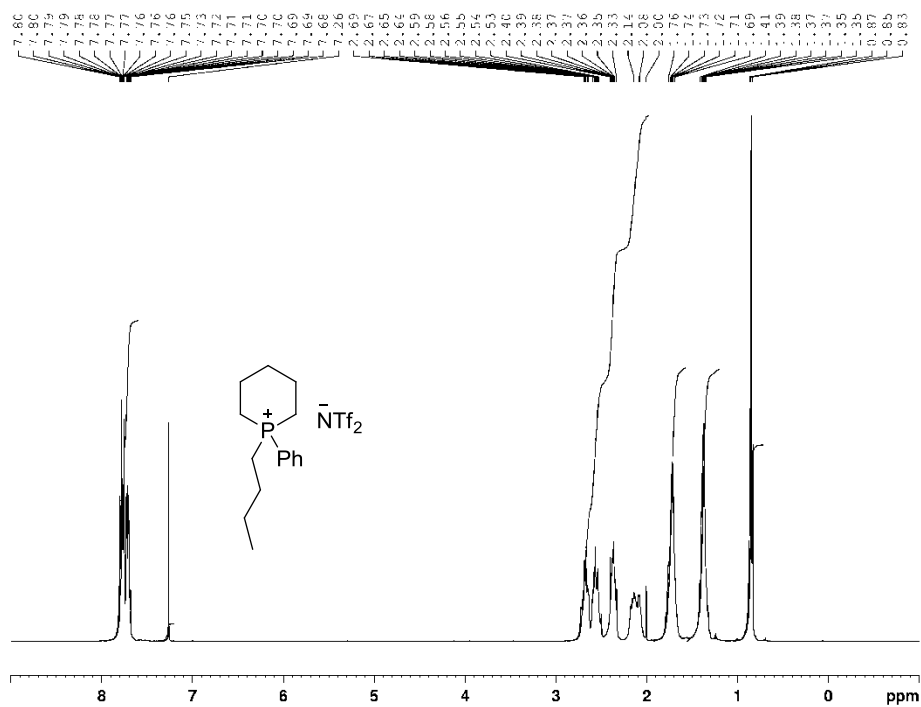



$^{13}\text{C}$  NMR ( $\text{CDCl}_3$ ): *5d*

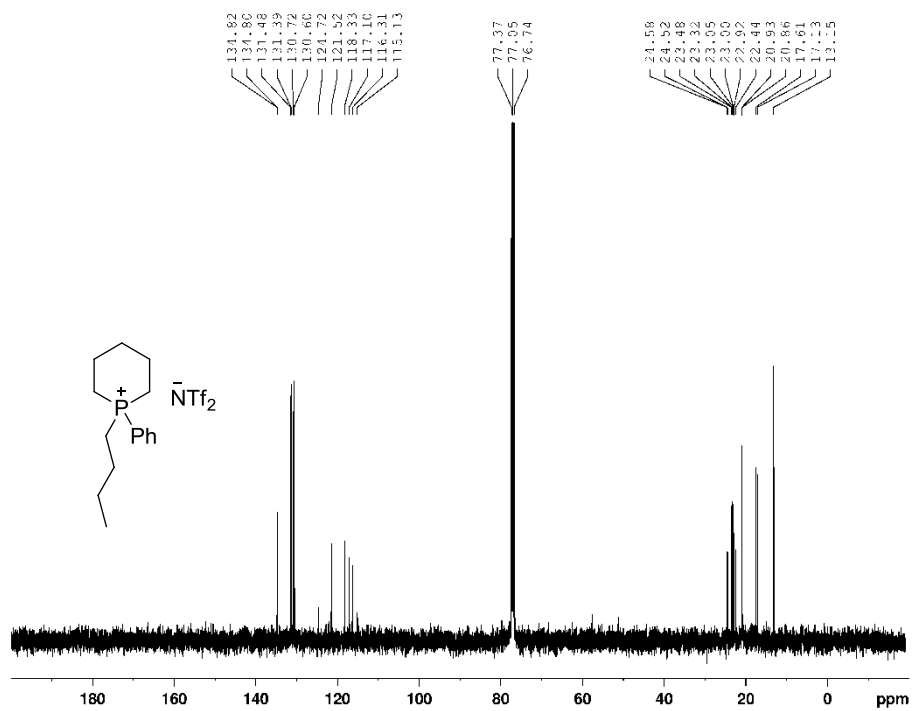

$^{31}\text{P}$  NMR ( $\text{CDCl}_3$ ): *5d*

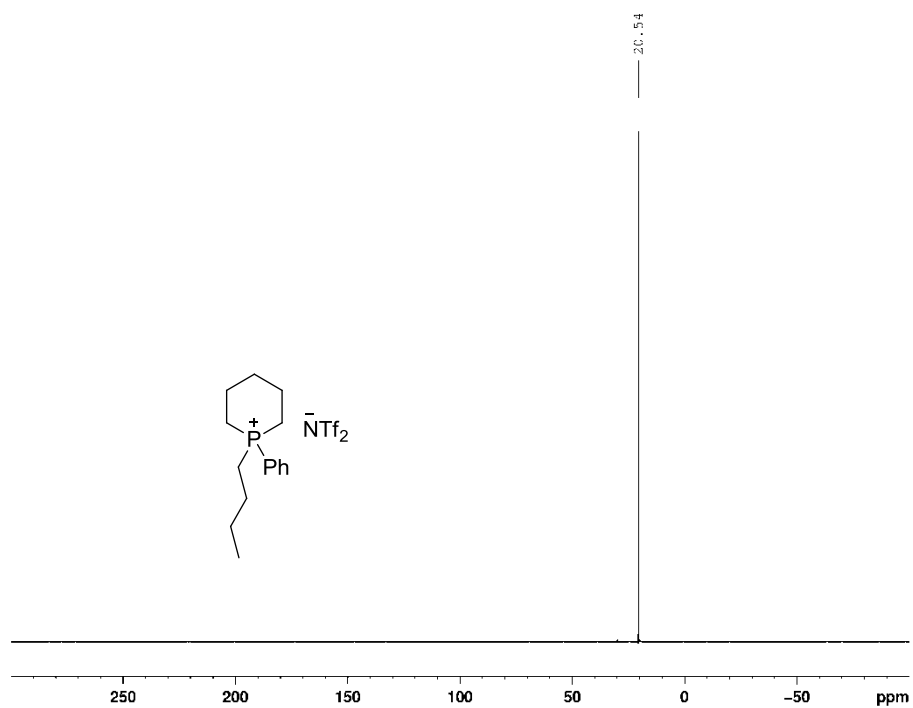

Supplement: Additional file 1 [file 1860-5397-10-22-S1.pdf]
