# Supplementary material for: Cyclic phosphonium ionic liquids
Source: publisher site journal article supplement (doi:10.3762/bjoc.10.22), 2014-01-24

**Supporting Information**  
**for**  
**Cyclic phosphonium ionic liquids**

Sharon I. Lall-Ramnarine\*<sup>1</sup>, Joshua A. Mukhlall<sup>1,2</sup>, James F. Wishart\*<sup>3</sup>, Robert R. Engel\*<sup>2</sup>,  
Alicia R. Romeo<sup>1</sup>, Masao Gohdo<sup>3,4</sup>, Sharon Ramati<sup>1,2</sup>, Marc Berman<sup>5</sup>, and Sophia N.  
Suarez<sup>6</sup>

Address: <sup>1</sup>Chemistry Department, Queensborough Community College of the City  
University of New York, 222-05 56<sup>th</sup> Avenue, Bayside, NY, 11364, USA, Fax: +1 718-  
281-5078, Tel: +1 718-281-5572, <sup>2</sup>Department of Chemistry and Biochemistry, Queens  
College of the City University of New York, 65-30 Kissena Boulevard, Flushing, NY,  
11367, USA, Fax: +1 718-997-5531, Tel: +1 718-997-4106, <sup>3</sup>Chemistry Department,  
Brookhaven National Laboratory, Upton, NY, 11973, USA, Fax: +1 631-344-5815, Tel:  
+1 631-344-4327, <sup>4</sup>The Institute of Scientific and Industrial Research (ISIR), Osaka  
University, 8-1 Mihogaoka, Ibaraki, Osaka 567-0047, Japan, <sup>5</sup>Department of Physics and  
Astronomy, Hunter College of the City University of New York, 695 Park Ave., New York,  
NY, 10065, USA and <sup>6</sup>Physics Department, Brooklyn College of the City University of  
New York, 2900 Bedford Avenue, Brooklyn, NY 11210, USA, Fax: +1 718-951-4407, Tel  
+1 718-951-5000, ext. 2869

Email: Sharon Lall-Ramnarine - slallramnarine@qcc.cuny.edu; James F. Wishart -  
wishart@bnl.gov; Robert R. Engel - Robert.engel@qc.cuny.edu

\*Corresponding author

**DSC Thermograms**

# Butylmethylphospholanium NTf<sub>2</sub> (5a)

Sample: P14\_phos\_NTf2  
Size: 8.6700 mg  
Method: Annealing C4mPhospholaniumNTf2  
Comment: P1,4(phos)NTf2, P-analogue of C4mPyrrNTf2, BM-Phospholanium

DSC

File: C:\...\JoshuaJM-82-3\IP14\_phos\_NTf2.011  
Operator: MG  
Run Date: 11-Mar-2012 21:17  
Instrument: DSC Q100 V9.9 Build 303

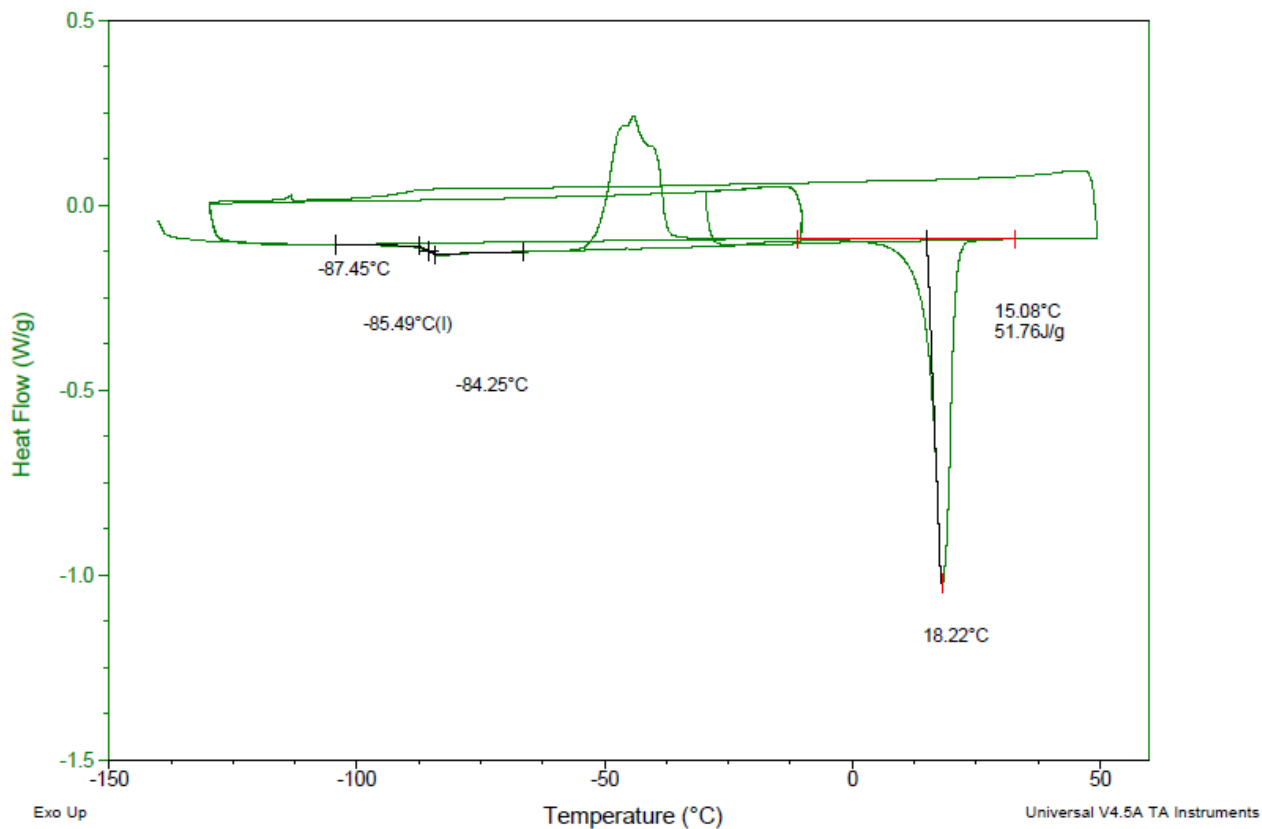

# Butylmethylphosphinanium NTf<sub>2</sub> (5b)

Sample: Pip14\_phos\_NTf2  
Size: 6.9600 mg  
Method: Annealing for pip14ntfs-P-ana  
Comment: Pip1,4(phos)NTf2, P-analogue of b-m piperidine, BM-Phosphorinani

DSC

File: C:\...\DSC\Joshua\Pip14\_phos\_NTf2.002  
Operator: MG  
Run Date: 09-Mar-2012 19:43  
Instrument: DSC Q100 V9.9 Build 303

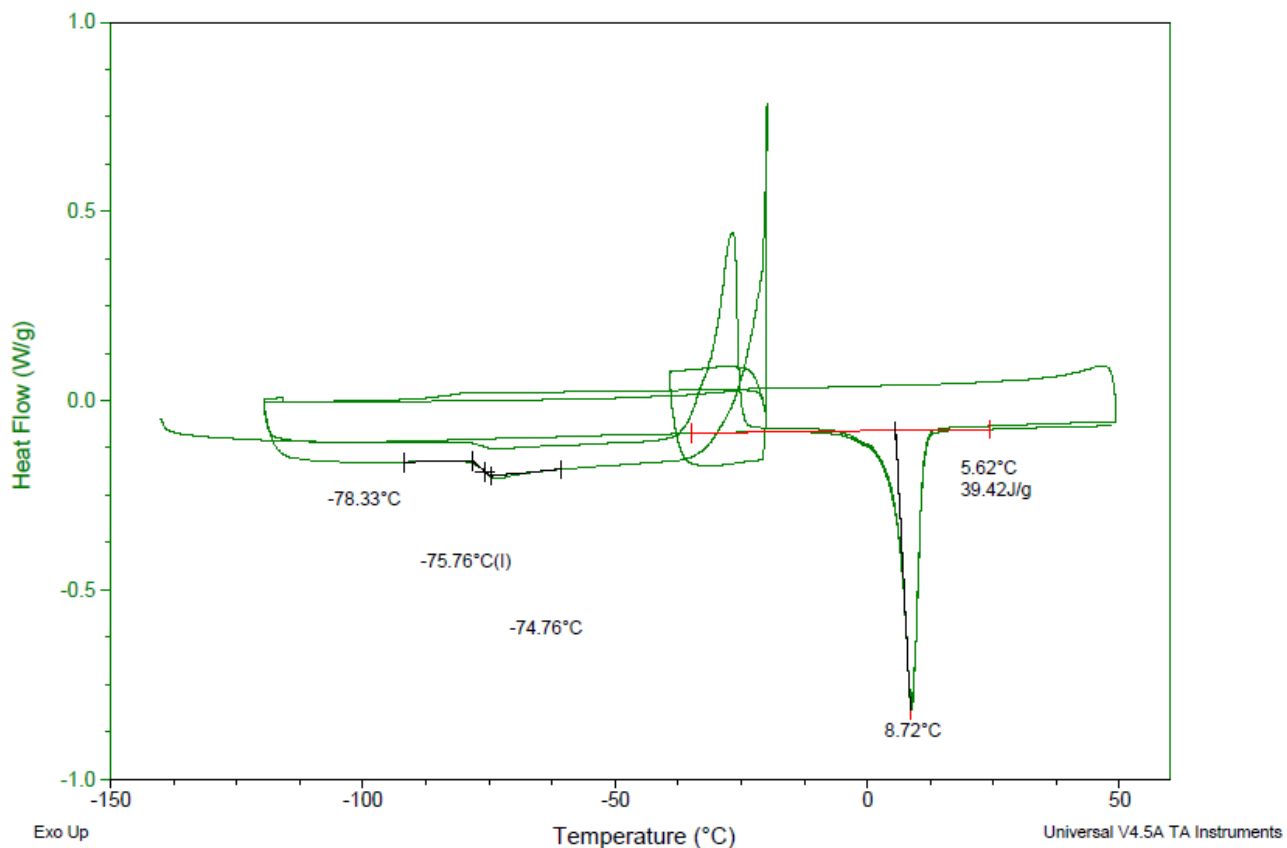

# Butylphenylphospholanium NTf<sub>2</sub> (5c)

Sample: JM 110-2  
Size: 7.0900 mg  
Method: Annealing C4Ph-phos  
Comment: Phenyl Butyl 5-membered phosphonium NTf<sub>2</sub>, crystallized by scratching

DSC

File: C:\DSC\Joshua\JM110-2\JM 110-2.007  
Operator: MG  
Run Date: 14-Jun-2012 18:42  
Instrument: DSC Q100 V9.9 Build 303

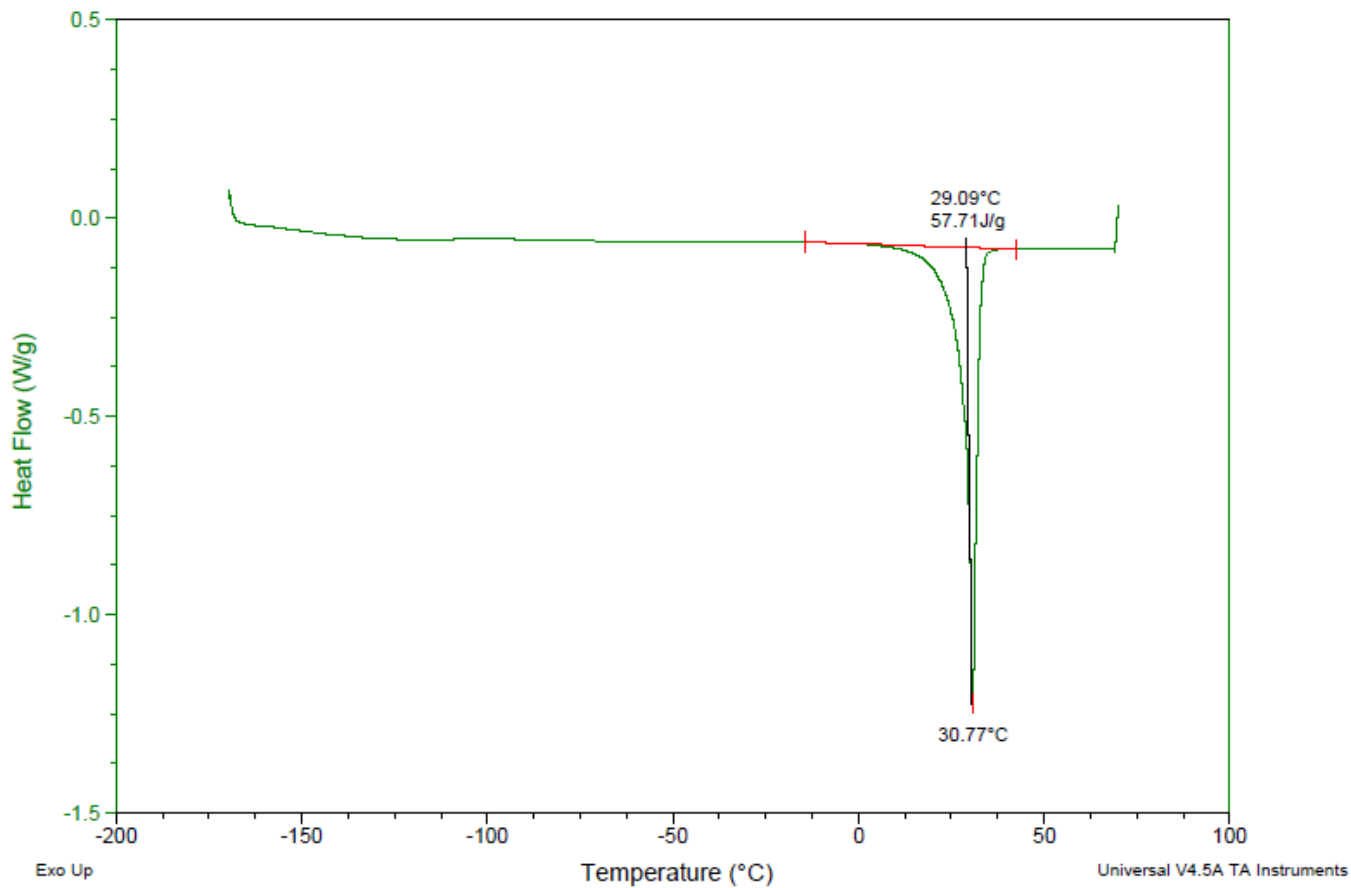

# Butylphenylphospholanium NTf<sub>2</sub> (5c)

Sample: JM 110-2

Size: 7.0900 mg

Method: Annealing C4Ph-phos

Comment: Phenyl Butyl 5-membered phosphonium NTf<sub>2</sub>, crystzid by scraching

DSC

File: C:\DSC\Joshua\JM110-2\JM 110-2.007

Operator: MG

Run Date: 14-Jun-2012 18:42

Instrument: DSC Q100 V9.9 Build 303

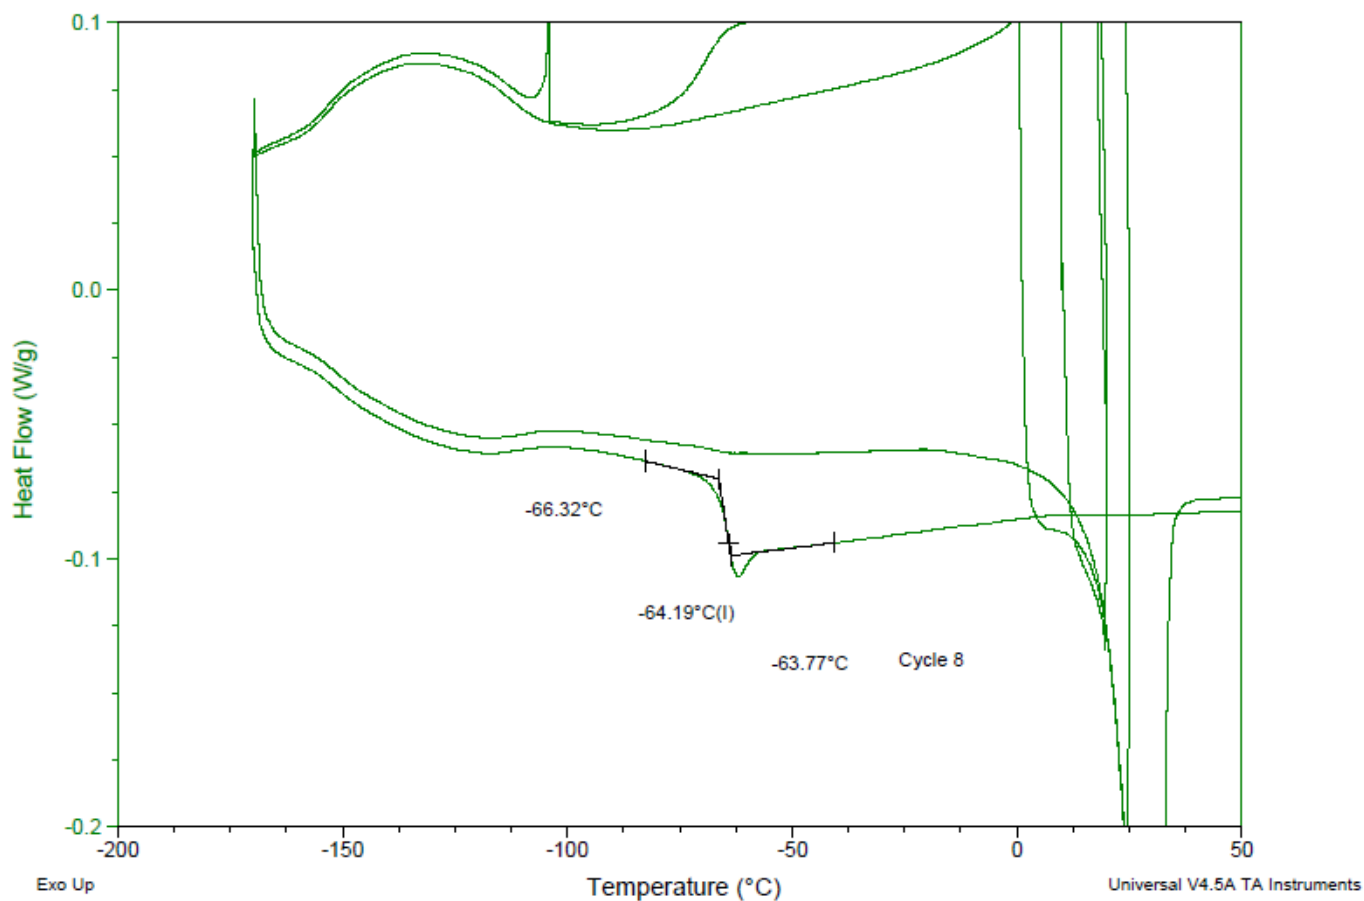

# Butylphenylphosphinanium NTf<sub>2</sub> (5d)

Sample: PhC4C6P- AR10 NTf2  
Size: 2.2500 mg  
Method: Standard triple scan start cold  
Comment: PhC4C6P- AR10 NTf2, phenylbutylphosphinanium NTf2

DSC

File: C:\TA\Data\DSC\Alicia\AR10NTf2.004  
Operator: SLR - MG  
Run Date: 31-Jul-2011 05:34  
Instrument: DSC Q100 V9.8 Build 296

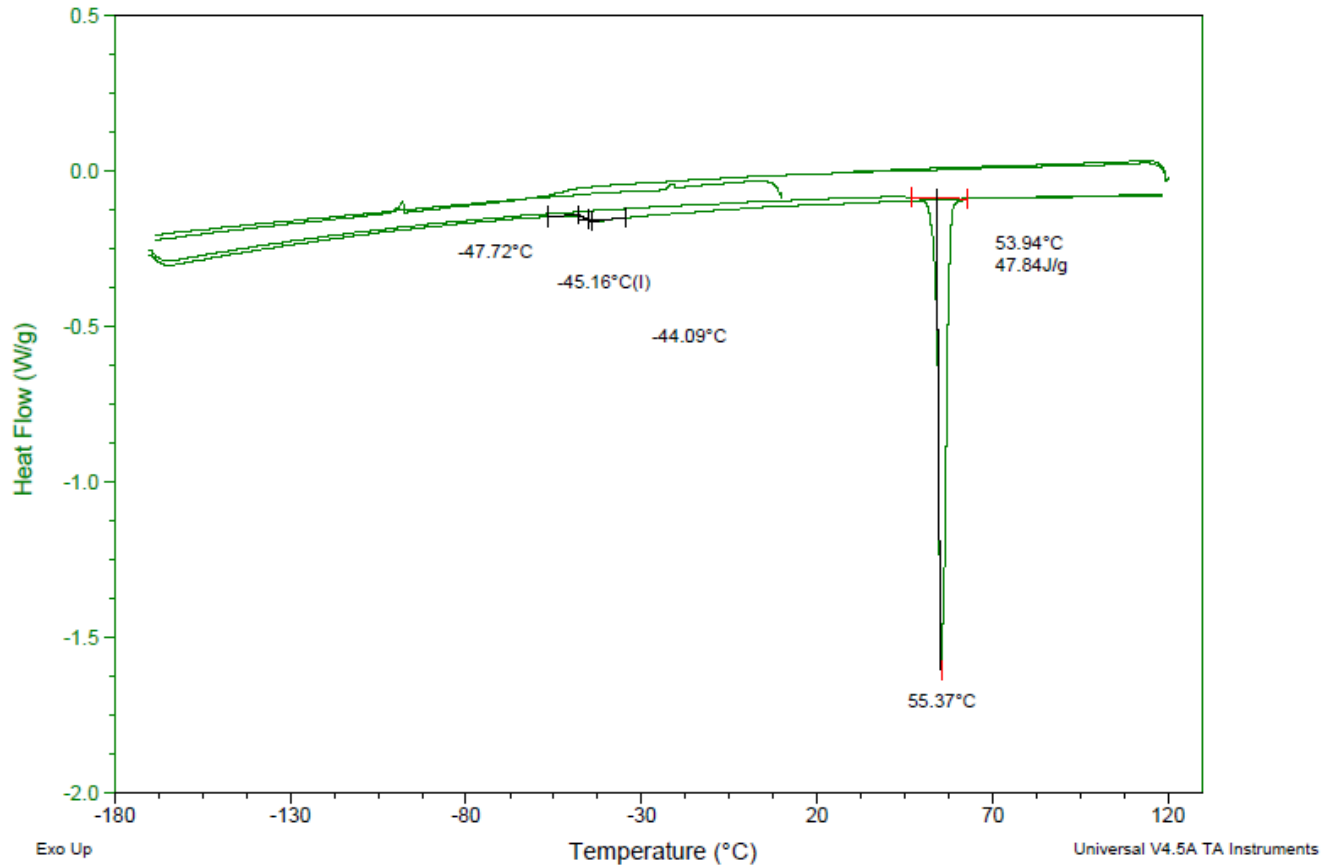

Supplement: Additional file 2 [file 1860-5397-10-22-S2.pdf]
