# Supplementary material for: Cyclic phosphonium ionic liquids
Source: publisher site journal article supplement (doi:10.3762/bjoc.10.22), 2014-01-24
Supplement: Additional file 3 [file 1860-5397-10-22-S3.pdf]

301 Moved Permanently

# Moved Permanently

The document has moved here.
